# Supplementary material
Source: PubMed Central journal article supplement (PMC5891421)
Supplement: EMBR-19-e44378-s001.pdf [file EMBR-19-e44378-s001.pdf]

**Appendix tables** for Kim et al., The ubiquitinating enzyme USP20 is required for autophagy initiation through the stabilization of ULK1.

**Appendix tables**

- 1. Appendix table S1 -----2
- 2. Appendix table S2 -----3
- 3. Appendix table S3 -----4

**Appendix table S1. Primer sequences used to construct plasmids in this study**

| <b>Construct</b>             | <b>Direction</b> | <b>Sequence(5'-3')</b>                                                           |
|------------------------------|------------------|----------------------------------------------------------------------------------|
| Flag-ULK1                    | Forward          | GATGAATTCATGGAGCCGGGCCGCGCGGC                                                    |
|                              | Reverse          | GATCTCGAGTAGTCAGGCATAGACACCACTCAG                                                |
| Flag-ULK1 KD                 | Forward          | GATGAATTCATGGAGCCGGGCCGCGCGGC                                                    |
|                              | Reverse          | GATCTCGAGTAGCAAGAAAGGGTGGTGGAAAAA                                                |
| Flag-ULK1 S/T                | Forward          | GATGAATTCGATGCCAGCACCCCATCAAG                                                    |
|                              | Reverse          | GATCTCGAGTAGAGCCTCGAAGGTCACAGCCCC                                                |
| Flag-ULK1 CTD                | Forward          | GATGAATTCCCTGACCTCCAGAGGAGACC                                                    |
|                              | Reverse          | GATCTCGAGTAGTCAGGCATAGACACCACTCAG                                                |
| Myc-ULK1                     | Forward          | ATGGAGCCCGGCCGCGGC                                                               |
|                              | Reverse          | TCAGGCACAGATGCCAGTC                                                              |
| HA-USP20                     | Forward          | ATGGGGGACTCCAGGGAC                                                               |
|                              | Reverse          | TCACACGGCCCCGCGTCTC                                                              |
| GST-USP20                    | Forward          | ATGGGGGACTCCAGGGAC                                                               |
|                              | Reverse          | TCACACGGCCCCGCGTCTC                                                              |
| Flag-USP20                   | Forward          | ATGGGGGACTCCAGGGAC                                                               |
|                              | Reverse          | TCACACGGCCCCGCGTCTC                                                              |
| Flag-USP20 ZF-UBP            | Forward          | ATGGGGGACTCCAGGGAC                                                               |
|                              | Reverse          | TCAGAGGCCTCGAGGTTTCAG                                                            |
| Flag-USP20 UCH               | Forward          | ACGGGCATGAAGAACCTC                                                               |
|                              | Reverse          | TCAGTAGAAGAGTACGTAGCC                                                            |
| Flag-USP20 DUSP              | Forward          | AGGAAGAGCAGCGAGGAG                                                               |
|                              | Reverse          | TCACACGGCCCCGCGTCTCGGC                                                           |
| Flag-rUSP20-CI (C154S,H643Q) | Forward          | C154S - CGGCGTTCATGTAGGAGGAGTTCCTCCGAGG<br>H643Q - GCAGGCAGTGGGCAGTACATCGCCTACTG |
|                              | Reverse          | C154S - CCTCGGGAACCTCCTACATGAACGCCG<br>H643Q - GCAGGCAGTGGGCAGTACATCGCCTACTG     |
| Flag-rUSP20-WT               | Forward          | GAGAGGAGCTGCGTAGATGTGCGTCATTGTCCGGCTCTG                                          |
|                              | Reverse          | CAGAGCCGGACAATGACGCACATCTACGCAGCTCCTCTC                                          |
| 3XFlag-mcherry-ULK1          | Forward          | GATGAATTCGATGGAGCCGGGCCGCGCGGC                                                   |
|                              | Reverse          | GATAGATCTTAGTCAGGCATAGACACCACTCAG                                                |
| Flag-ULK1 K865R              | Forward          | GAGATTGCAGCCCTGAGGGGAAGTGCCAGTGAG                                                |
|                              | Reverse          | CTCACTGGCACTTCCCCTCAGGGCTGCAATCTC                                                |
| Flag-ULK1 K906R              | Forward          | CTGGTTCTGTA CTTGAGGGTGGCTGAGCTGCTG                                               |
|                              | Reverse          | CAGCAGCTCAGCCACCCTCAAGTACAGAACCAG                                                |
| Flag-ULK1 K926R              | Forward          | CAGATTTCGAGCTGGCAGACTCTGCCTTTCATCT                                               |
|                              | Reverse          | AGATGAAAGGCAGAGTCTGCCAGCTCGAATCTG                                                |
| Flag-ULK1 K934R              | Forward          | CTTTCATCTACTGTGAGGCAGGTGGTACGCAGA                                                |
|                              | Reverse          | TCTGCGTACCACCTGCCTCACAGTAGATGAAAG                                                |
| Flag-ULK1 K945R              | Forward          | CTAAATGAGCTGTACAGGGCCAGCGTGGTATCC                                                |
|                              | Reverse          | GGATACCACGCTGGCCCTGTACAGCTCATTAG                                                 |
| Flag-ULK1 K965R              | Forward          | CGCTTCTTCTGGACAGACAACGGCTGCTGGAC                                                 |
|                              | Reverse          | GTCCAGCAGCCGTTGTCTGTCCAGAAAGAAGCG                                                |
| Flag-ULK1 K1010R             | Forward          | GTACCGAGATATCACAGAGCCCTGCTATTGCTG                                                |
|                              | Reverse          | CAGCAATAGCAGGGCTCTGTGATATCTCGGTAC                                                |
| Flag-ULK1 K1033R, K1035R     | Forward          | ATTGAGAACATTGCCAGATGCAGGCTGTGCATTGAGAGG                                          |
|                              | Reverse          | CCTCTCAATGCACAGCCTGCATCTGGCAATGTTCTCAAT                                          |

**Appendix table S2. Primary antibodies used in this study**

| Antibody name                                                                         | Company name      | Cat No.      | Species | Assay | Dilution / Amount | Validation           | Citation                                                                                                |
|---------------------------------------------------------------------------------------|-------------------|--------------|---------|-------|-------------------|----------------------|---------------------------------------------------------------------------------------------------------|
| ULK1                                                                                  | Cell signaling    | #8054        | Rabbit  | IB    | 1:2000            | Datasheet by company | PLoS One. 2017 Sep 14;12(9):e0184909. doi: 10.1371/journal.pone.0184909. eCollection 2017.              |
| ULK1                                                                                  | Santa Cruz        | sc-33182     | Rabbit  | IP    | 1 µg              | Datasheet by company | EMBO J. 2015 May 5;34(9):1214-30. doi: 10.15252/embj.201489920. Epub 2015 Mar 14.                       |
| phospho-ULK1 Ser758                                                                   | Cell signaling    | #6888        | Rabbit  | IB    | 1:2000            | Datasheet by company | Nat Commun. 2017 Sep 18;8(1):571. doi: 10.1038/s41467-017-00628-y.                                      |
| cleaved-Caspase3                                                                      | Cell signaling    | #9661        | Rabbit  | IB    | 1:5000            | Datasheet by company | Nat Commun. 2017 Sep 19;8(1):598. doi: 10.1038/s41467-017-00590-9.                                      |
| S6K                                                                                   | Cell signaling    | #9202        | Rabbit  | IB    | 1:2000            | Datasheet by company | Mol Oncol. 2017 Sep;11(9):1143-1155. doi: 10.1002/1878-0261.12079. Epub 2017 Jun 28                     |
| phospho-S6K Thr389                                                                    | Cell signaling    | #9234        | Rabbit  | IB    | 1:5000            | Datasheet by company | Nat Commun. 2017 Sep 19;8(1):584. doi: 10.1038/s41467-017-00551-2.                                      |
| LC3B                                                                                  | Cell signaling    | #9234        | Rabbit  | IB    | 1:2000            | Datasheet by company | EMBO Rep. 2017 Oct;18(10):1727-1739. doi: 10.15252/embr.201744069. Epub 2017 Aug 23.                    |
| PARP                                                                                  | Cell signaling    | #9542        | Rabbit  | IB    | 1:5000            | Datasheet by company | Exp Ther Med. 2017 Oct;14(4):3265-3272. doi: 10.3892/etm.2017.4873. Epub 2017 Aug 2.                    |
| SQSTM1/p62                                                                            | Cell signaling    | #D5E2        | Rabbit  | IB    | 1:2000            | Datasheet by company | Cell Death Dis. 2017 Sep 14;8(9):e3048. doi: 10.1038/cddis.2017.438.                                    |
| USP20/VDU2                                                                            | Bethyl laboratory | A301-189A    | Rabbit  | IB    | 1:2000            | Datasheet by company | J Biol Chem. 2016 Apr 1;291(14):7450-64. doi: 10.1074/jbc.M115.687129. Epub 2016 Feb 2.                 |
| ATG13                                                                                 | Sigma             | SAB4200100   | Rabbit  | IB    | 1:5000            | Datasheet by company | Autophagy. 2014 Jun;10(6):957-71. doi: 10.4161/auto.28363.                                              |
| phospho-ATG13 S318                                                                    | Rockland          | 600-401-C49  | Rabbit  | IB    | 1:5000            | Datasheet by company | Elife. 2017 Feb 14;6. pii: e23063. doi: 10.7554/eLife.23063                                             |
| ATG5                                                                                  | Cell signaling    | #12994       | Rabbit  | IB    | 1:5000            | Datasheet by company | PLoS One. 2017 Sep 14;12(9):e0184909. doi: 10.1371/journal.pone.0184909. eCollection 2017.              |
| β-actin                                                                               | Sigma             | A5441        | Mouse   | IB    | 1:10000           | Datasheet by company | Br J Cancer. 2014 Oct 28;111(9):1788-801. doi: 10.1038/bjc.2014.475. Epub 2014 Aug 28.                  |
| Flag                                                                                  | Sigma             | F7425        | Rabbit  | IB    | 1:5000            | Datasheet by company | Autophagy. 2014 Sep;10(9):1549-64. doi: 10.4161/auto.29329. Epub 2014 Jun 30.                           |
| Flag M2                                                                               | Sigma             | F1804        | Mouse   | IP    | 1 µg              | Datasheet by company | Cell Cycle. 2017 May 19;16(10):947-956. doi: 10.1080/15384101.2017.1310350. Epub 2017 Apr 5.            |
| FIP200                                                                                | Protein Tech      | 17250-1-AP   | Rabbit  | IB    | 1:2000            | Datasheet by company | Autophagy. 2017 May 4;13(5):955-966. doi: 10.1080/15548627.2017.1287652. Epub 2017 Feb 15.              |
| HA-peroxidase                                                                         | Roche             | 12013819001  | Mouse   | IB    | 1:5000            | Datasheet by company | Nat Commun. 2014 Sep 11;5:4857                                                                          |
| Myc-peroxidase                                                                        | Roche             | 118141500001 | Mouse   | IB    | 1:10000           | Datasheet by company | Mol Cell Biol. 2015 May;35(10):1741-53                                                                  |
| Tubulin                                                                               | Merck Millipore   | 05-829       | Mouse   | IB    | 1:10000           | Datasheet by company | J Cell Mol Med. 2015 Jan;19(1):210-26. doi: 10.1111/jcmm.12418. Epub 2014 Sep 30.                       |
| FK2                                                                                   | Enzo              | BML-PW0150   | Mouse   | IB    | 1:2000            | Datasheet by company | Biochim Biophys Acta. 2016 Nov;1863(11):2658-2667. doi: 10.1016/j.bbamcr.2016.08.006. Epub 2016 Aug 16. |
| Annexin V                                                                             | BD Pharmingen     | 556547       | NA      | F     | 3 µl/100 µl       | Datasheet by company | J Biol Chem. 1990 Mar 25;265(9):4923-8.                                                                 |
| 7-AAD                                                                                 | BD Pharmingen     | 559763       | NA      | F     | 3 µl/100 µl       | Datasheet by company | Proc Natl Acad Sci U S A. 1996 Feb 20;93(4):1624-9.                                                     |
| <b>NA: Not Applicable, IB: Immunoblot, IP: Immunoprecipitation, F: Flow cytometry</b> |                   |              |         |       |                   |                      |                                                                                                         |

**Appendix table S3. Target Sequences of siRNAs used in this study**

| <b>siRNA</b> | <b>Species</b> | <b>Target Sequences</b> |
|--------------|----------------|-------------------------|
| siUSP20-1    | Human          | GGACAATGATGCTCACCTA     |
| siUSP20-2    | Human          | TCGAGTGACACGGATGAGAAA   |
| siULK1       | Human          | CGGAGAGCCTGCAGGAGAA     |
